# Supplementary material
Source: PubMed Central journal article supplement (PMC3255805)
Supplement: supp_86.2.947_TableS1.pdf [file supp_86.2.947_TableS1.pdf]

TABLE S1. Summary of study subjects

| Subjects           | Sources                                        | Screen Date | Serum/Plasma | CD4 Count | HIV-2 VL | Neut activities (Reciprocal IC <sub>50</sub> ) |         |         |             | mAb Competition (Reciprocal EC <sub>50</sub> ) |              |               |  |
|--------------------|------------------------------------------------|-------------|--------------|-----------|----------|------------------------------------------------|---------|---------|-------------|------------------------------------------------|--------------|---------------|--|
|                    |                                                |             |              |           |          | ST                                             | UC1     | 7312A   | 1.7A-MVp120 | 6.10F-STgp120                                  | 1.7A-STgp120 | 6.10B-STgp120 |  |
| DKN1               | University of Washington                       | 11/2/94     | Serum        | 374       | 3611     | 22222                                          | 18182   | 111111  | 647         | 606                                            | 1213         | 500           |  |
| DKN131             | University of Washington                       | 3/6/95      | Serum        | 314       | 197      | 66667                                          | 125000  | 500000  | 5552        | 1776                                           | 17969        | 258           |  |
| DKN147             | University of Washington                       | 3/10/95     | Serum        | 309       | 29       | 37037                                          | 3968    | 250000  | 240         | 293                                            | 6612         | 64            |  |
| DKN183             | University of Washington                       | 4/5/95      | Serum        | 603       | 0        | 40000                                          | 125000  | 83333   | 2873        | 1001                                           | 11697        | 314           |  |
| DKN207             | University of Washington                       | 4/28/95     | Serum        | 1272      | 0        | 7194                                           | 2674    | 31250   | 43          | 224                                            | 734          | 116           |  |
| DKN228             | University of Washington                       | 6/13/95     | Serum        | 412       | 4830     | 83333                                          | 125000  | 333333  | 3131        | 1420                                           | 11610        | 101           |  |
| DKN240             | University of Washington                       | 6/26/95     | Serum        | 318       | 225      | 30303                                          | 83333   | 200000  | 863         | 619                                            | 5604         | 80            |  |
| DKN317             | University of Washington                       | 8/21/95     | Serum        | 486       | 5158     | 71429                                          | 50000   | 333333  | 873         | 327                                            | 12362        | <50           |  |
| DKN359             | University of Washington                       | 10/13/95    | Serum        | 381       | 488      | 21277                                          | 35714   | 166667  | 1782        | 422                                            | 1948         | 141           |  |
| MB173              | University of Washington                       | 1/2/92      | Serum        | 673       | 158      | 111111                                         | 166667  | 250000  | 9361        | 1656                                           | 2803         | 867           |  |
| MBN66              | University of Washington                       | 3/15/95     | Serum        | 970       | 0        | 27027                                          | 58824   | 142857  | 942         | 1482                                           | 3222         | 281           |  |
| MBN79              | University of Washington                       | 3/16/95     | Serum        | 705       | 0        | 90909                                          | 83333   | 500000  | 1715        | 1855                                           | 15454        | 448           |  |
| MBN114             | University of Washington                       | 4/27/95     | Serum        | 1381      | 0        | 18519                                          | 16393   | 166667  | 1022        | 279                                            | 3928         | 136           |  |
| MBN115             | University of Washington                       | 4/27/95     | Serum        | 973       | 182      | 22222                                          | 14085   | 142857  | 782         | 298                                            | 7267         | 125           |  |
| MBN129             | University of Washington                       | 7/6/95      | Serum        | 728       | 0        | 333333                                         | 166667  | 1000000 | 10946       | 2602                                           | 9732         | 389           |  |
| MBN159             | University of Washington                       | 11/30/95    | Serum        | 587       | 174      | 5263                                           | 3115    | 41667   | 37          | 559                                            | 1995         | 212           |  |
| MBN173             | University of Washington                       | 1/18/96     | Serum        | 922       | 142      | 14085                                          | 16393   | 62500   | 661         | 1282                                           | 1438         | 756           |  |
| MBN255             | University of Washington                       | 9/25/97     | Serum        | 259       | 11408    | 27778                                          | 3497    | 125000  | 535         | 510                                            | 3198         | 70            |  |
| MIH5               | University of Washington                       | 3/15/95     | Serum        | 151       | 0        | 35714                                          | 25641   | 1000000 | 2049        | 562                                            | 19720        | 530           |  |
| MIH83              | University of Washington                       | 4/24/95     | Serum        | 26        | 37673    | 11494                                          | 17544   | 83333   | 1371        | 148                                            | 1522         | 65            |  |
| MIH275             | University of Washington                       | 7/14/95     | Serum        | 139       | 410      | 250000                                         | 200000  | 1000000 | 13581       | 4168                                           | 25767        | 423           |  |
| MIH424             | University of Washington                       | 9/12/95     | Serum        | 1071      | 122      | 200000                                         | 142857  | 1000000 | 7727        | 3963                                           | 18584        | 709           |  |
| MIH439             | University of Washington                       | 9/18/95     | Serum        | 227       | 452      | 35714                                          | 45455   | 333333  | 13461       | 863                                            | 4230         | 155           |  |
| MIH711             | University of Washington                       | 1/26/96     | Serum        | 366       | 0        | 35714                                          | 37037   | 250000  | 1699        | 777                                            | 9410         | 522           |  |
| MIH790             | University of Washington                       | 3/20/96     | Serum        | 236       | 10084    | 17857                                          | 1391    | 55556   | 70          | 288                                            | 1020         | 271           |  |
| MIH939             | University of Washington                       | 8/9/96      | Serum        | 479       | 30       | 66667                                          | 37037   | 500000  | 1873        | 2187                                           | 9446         | 823           |  |
| MIH946             | University of Washington                       | 8/16/96     | Serum        | 159       | 14239    | 125000                                         | 250000  | 1000000 | 6718        | 932                                            | 17599        | 92            |  |
| MIH1026            | University of Washington                       | 10/30/96    | Serum        | 163       | 137      | 26316                                          | 83333   | 100000  | 1345        | <50                                            | 1474         | 431           |  |
| MIH1034            | University of Washington                       | 11/7/96     | Serum        | 164       | 6250     | 100000                                         | 1000000 | 500000  | 29551       | 5209                                           | 10213        | 400           |  |
| MIH1245            | University of Washington                       | 8/13/97     | Serum        | 134       | 4167     | 111111                                         | 55556   | 500000  | 2463        | 249                                            | 8012         | 292           |  |
| MIN27              | University of Washington                       | 10/24/94    | Serum        | 482       | 0        | 26316                                          | 76923   | 166667  | 12421       | 344                                            | 2444         | 64            |  |
| MIN63              | University of Washington                       | 11/22/94    | Serum        | 360       | 73       | 23256                                          | 34483   | 166667  | 5778        | 357                                            | 3102         | 86            |  |
| MIN652             | University of Washington                       | 2/28/95     | Serum        | 44        | 9412     | 55556                                          | 33333   | 200000  | 1352        | <50                                            | 6085         | 255           |  |
| MIN978             | University of Washington                       | 5/4/95      | Serum        | 439       | 0        | 26316                                          | 20408   | 166667  | NA          | 331                                            | 3318         | 209           |  |
| MIN1081            | University of Washington                       | 6/2/95      | Serum        | 41        | 51000    | 31250                                          | 27027   | 125000  | 904         | 624                                            | 2329         | 342           |  |
| MIN1483            | University of Washington                       | 9/4/95      | Serum        | 663       | 0        | 27778                                          | 28571   | 100000  | 50          | 241                                            | 1589         | 236           |  |
| MIN1711            | University of Washington                       | 10/12/95    | Serum        | 517       | 0        | 7194                                           | 7246    | 20408   | 50          | 175                                            | 148          | 166           |  |
| MIN1751            | University of Washington                       | 10/20/95    | Serum        | 240       | 440      | 23256                                          | 10309   | 76923   | 1042        | 4660                                           | 1856         | 75            |  |
| MIN1788            | University of Washington                       | 10/30/95    | Serum        | 618       | 0        | 45455                                          | 20408   | 250000  | 220         | 1688                                           | 7518         | 262           |  |
| MIN1974            | University of Washington                       | 12/11/95    | Serum        | 505       | 455      | 58824                                          | 71429   | 333333  | 526         | 243                                            | 6149         | 367           |  |
| MIN2116            | University of Washington                       | 1/17/96     | Serum        | 992       | 0        | 27778                                          | 25641   | 142857  | 3316        | 1683                                           | 1708         | 182           |  |
| MIN2290            | University of Washington                       | 2/27/96     | Serum        | 258       | 2793     | 17544                                          | 6897    | 83333   | 50          | 1212                                           | 603          | 313           |  |
| MIN2411            | University of Washington                       | 3/22/96     | Serum        | 826       | 0        | 76923                                          | 100000  | 500000  | 26511       | 489                                            | 8076         | 519           |  |
| MIN2616            | University of Washington                       | 5/31/96     | Serum        | 536       | 50       | 27778                                          | 62500   | 166667  | 19972       | 703                                            | 2058         | 90            |  |
| MIN2982            | University of Washington                       | 9/5/96      | Serum        | 867       | 0        | 27027                                          | 62500   | 76923   | 10846       | <50                                            | 1901         | 100           |  |
| MIN3171            | University of Washington                       | 10/28/96    | Serum        | 908       | 0        | 18182                                          | 25000   | 90909   | 101         | 139                                            | 1323         | <50           |  |
| MIN3177            | University of Washington                       | 10/30/96    | Serum        | 482       | 0        | 17241                                          | 27778   | 71429   | 758         | 106                                            | 722          | 76            |  |
| MIN3295            | University of Washington                       | 12/2/96     | Serum        | 918       | 0        | 4717                                           | 1370    | 15873   | 50          | 127                                            | 241          | 91            |  |
| MIN3435            | University of Washington                       | 1/14/97     | Serum        | 360       | 173      | 33333                                          | 28571   | 250000  | 1400        | 1862                                           | 3742         | 63            |  |
| MIN3473            | University of Washington                       | 1/21/97     | Serum        | 125       | 24963    | 111111                                         | 500000  | 1000000 | NA          | NA                                             | NA           | NA            |  |
| MIN4027            | University of Washington                       | 7/24/97     | Serum        | 618       | 0        | 100000                                         | 50000   | 1000000 | 3273        | 2353                                           | 16869        | 248           |  |
| MIN4106            | University of Washington                       | 8/19/97     | Serum        | 512       | 0        | 31250                                          | 8000    | 125000  | 98          | 136                                            | 4629         | 173           |  |
| 7312A <sup>a</sup> | Côte d'Ivoire                                  | 1/28/92     | Plasma       | NA        | 425      | NA                                             | NA      | NA      | NA          | NA                                             | NA           | NA            |  |
|                    |                                                | 10/14/03    | Plasma       | NA        | 100      | 4673                                           | 17544   | 30303   | NA          | NA                                             | NA           | NA            |  |
| 8704A <sup>a</sup> | Serologicals Corporation                       | 5/4/06      | Plasma       | NA        | 160      | NA                                             | NA      | NA      | NA          | NA                                             | NA           | NA            |  |
|                    |                                                | 1/9/07      | Plasma       | NA        | NA       | 374225                                         | NA      | 180540  | NA          | NA                                             | NA           | NA            |  |
| 7810A              | Serologicals Corporation                       | 5/7/93      | Plasma       | NA        | NA       | 3802                                           | 8772    | 12195   | NA          | NA                                             | NA           | NA            |  |
| 7924A              | Serologicals Corporation                       | 8/19/93     | Plasma       | NA        | NA       | 25000                                          | 166667  | 250000  | NA          | NA                                             | NA           | NA            |  |
| 60667K             | Serologicals Corporation                       | 6/16/93     | Plasma       | NA        | NA       | 166667                                         | 500000  | 1000000 | NA          | NA                                             | NA           | NA            |  |
| 10849 <sup>a</sup> | Columbia University                            | 3/30/95     | Plasma       | NA        | 0        | NA                                             | NA      | NA      | NA          | NA                                             | NA           | NA            |  |
|                    |                                                | 4/13/95     | Plasma       | NA        | NA       | 4975                                           | 12195   | 35714   | NA          | 78                                             | 880          | 78            |  |
| SLRHC No.10        | Columbia University                            | 5/18/95     | Plasma       | NA        | 0        | 20408                                          | 71429   | 200000  | NA          | 84                                             | 2536         | 96            |  |
| 1026               | NIH Aids Reagent and Reference Reagent Program | NA          | Serum        | NA        | NA       | 3984                                           | 1124    | 6849    | NA          | NA                                             | NA           | NA            |  |
| 1030               | NIH Aids Reagent and Reference Reagent Program | NA          | Serum        | NA        | NA       | 20408                                          | 7874    | 32258   | NA          | NA                                             | NA           | NA            |  |
| 1032               | NIH Aids Reagent and Reference Reagent Program | NA          | Serum        | NA        | NA       | 5128                                           | 7407    | 22222   | NA          | NA                                             | NA           | NA            |  |
| 1495               | NIH Aids Reagent and Reference Reagent Program | NA          | Serum        | NA        | NA       | 111111                                         | 142857  | 1000000 | NA          | NA                                             | NA           | NA            |  |
| 3660               | NIH Aids Reagent and Reference Reagent Program | NA          | Serum        | NA        | NA       | 6135                                           | 806     | 35714   | NA          | NA                                             | NA           | NA            |  |

<sup>a</sup>Plasma was collected at two time points.  
NA, not available.
